# Supplementary material for: Evolution Analysis of Free Fatty Acids and Aroma-Active Compounds during Tallow Oxidation
Source: MDPI journal article supplement (doi:10.3390/molecules27020352), 2022-01-06
Supplement: s1 [file s1]

Table S1. Standard curves of aroma-active compounds.

| Compound              | Standard Curve             | R <sup>2</sup> | LOD     | LOQ     |
|-----------------------|----------------------------|----------------|---------|---------|
|                       |                            |                | (mg/kg) | (mg/kg) |
| Hexanal               | $y = 0.69487x - 0.07866$   | 0.99964        | 1.19    | 3.97    |
| 1-Penten-3-ol         | $y = 0.09988x + 0.00404$   | 0.99621        | 0.58    | 1.94    |
| Heptanal              | $y = 0.14389x - 0.00251$   | 0.99865        | 0.50    | 1.65    |
| D-Limonene            | $y = 0.56831x - 0.01224$   | 0.99869        | 0.49    | 1.63    |
| (E)-2-Hexenal         | $y = 0.15672x + 0.00033$   | 0.99796        | 0.21    | 0.69    |
| 2-pentylfuran         | $y = 0.58169x - 0.01897$   | 0.99894        | 0.08    | 0.25    |
| 1-Pentanol            | $y = 0.15509x - 0.00226$   | 0.99851        | 0.40    | 1.34    |
| 2-Octanone            | $y = 0.28257x - 0.00668$   | 0.99875        | 0.13    | 0.43    |
| Octanal               | $y = 0.21745x - 0.01109$   | 0.9982         | 0.91    | 3.03    |
| (E)-2-Heptenal        | $y = 0.23307x - 0.00256$   | 0.99962        | 0.32    | 1.06    |
| 2-Nonanone            | $y = 0.52404x - 0.04584$   | 0.99407        | 0.53    | 1.77    |
| Nonanal               | $y = 0.843x - 0.09298$     | 0.99326        | 0.39    | 1.30    |
| (E)-2-Octenal         | $y = 0.38068x - 0.03393$   | 0.99383        | 0.11    | 0.38    |
| 1-Octen-3-ol          | $y = 0.31183x - 0.00656$   | 0.9994         | 0.55    | 1.83    |
| 1-Heptanol            | $y = 0.32085x - 0.0129$    | 0.99848        | 0.10    | 0.35    |
| (E,E)-2,4-Heptadienal | $y = 0.28538x + 0.11322$   | 0.99483        | 0.17    | 0.57    |
| Decanal               | $y = 0.29125x - 0.02488$   | 0.99718        | 0.55    | 1.83    |
| Benzaldehyde          | $y = 0.6488x - 0.01042$    | 0.99935        | 1.16    | 3.88    |
| (E)-2-Nonenal         | $y = 0.37671x - 0.01913$   | 0.99796        | 0.68    | 2.25    |
| Propanoic acid        | $y = 0.13163x + 0.02013$   | 0.99187        | 0.24    | 0.81    |
| 1-Octanol             | $y = 0.33019x - 0.01765$   | 0.99833        | 0.69    | 2.31    |
| Gamma-Valerolactone   | $y = 0.17123x - 0.00477$   | 0.99842        | 0.32    | 1.08    |
| Butanoic acid         | $y = 0.32623x - 0.02181$   | 0.99786        | 0.33    | 1.10    |
| Gamma-Hexalactone     | $y = 0.31295x + 0.00503$   | 0.99687        | 0.10    | 0.33    |
| Pentanoic acid        | $y = 0.14903x - 0.00384$   | 0.99976        | 0.68    | 2.28    |
| Gamma-Heptalactone    | $y = 0.48038x - 0.02853$   | 0.99685        | 0.16    | 0.52    |
| (E,E)-2,4-Decadienal  | $y = 0.31049x - 0.0006875$ | 0.99799        | 0.08    | 0.27    |
| Hexanoic acid         | $y = 0.28146x - 0.00875$   | 0.99961        | 0.15    | 0.51    |
| Gamma-Octalactone     | $y = 0.66578x + 0.03967$   | 0.99762        | 0.25    | 0.84    |
| Heptanoic acid        | $y = 1.03952x - 0.19492$   | 0.9739         | 0.56    | 1.87    |
| Octanoic acid         | $y = 0.37274x - 0.05133$   | 0.99974        | 1.72    | 5.75    |
| Nonanoic acid         | $y = 0.38859x - 0.05638$   | 0.99984        | 0.23    | 0.76    |
| n-Decanoic acid       | $y = 0.70366x - 0.13311$   | 0.99938        | 0.70    | 2.35    |
| Dodecanoic acid       | $y = 0.83913x - 0.21726$   | 0.99936        | 1.04    | 3.47    |
| Tetradecanoic acid    | $y = 0.62483x + 0.1651$    | 0.99936        | 2.63    | 8.77    |

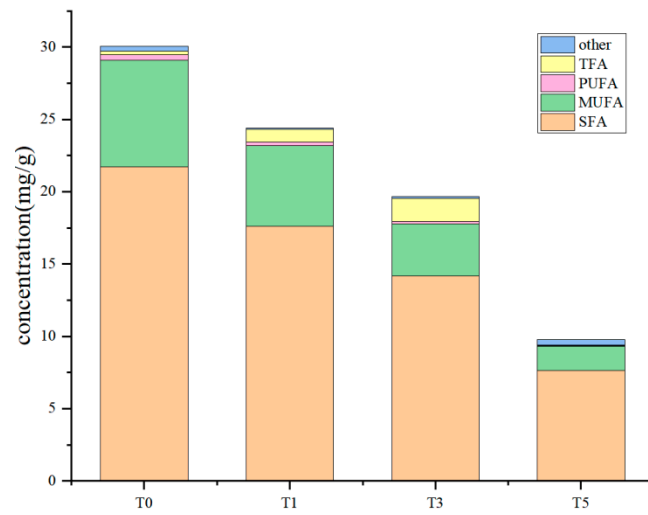

**Figure S1.** FFAs concentration histogram (SFA: saturated fatty acid, MUFA: monounsaturated fatty acid, PUFA: polyunsaturated fatty acid, TFA: trans fatty acid).
